# Supplementary material for: Development and evaluation of a mechanical ventilator-sharing system
Source: Front Med (Lausanne). 2024 Feb 16;11:1356769. doi: 10.3389/fmed.2024.1356769 (PMC10905385; doi:10.3389/fmed.2024.1356769)
Supplement: Supplementary file 2 [file Table_1.xlsx]

## Sheet: short_SA
Table 1
S Achanta et al, 2024. Development and evaluation of a mechanical ventilator-sharing system. Front. Med. 11:1356769. doi: 10.3389/fmed.2024.1356769
		VTi							VTe							VTave							PEEP							MeanPaw							PIF							PEF
		NM3		VG					NM3		VG					NM3		VG					NM3		VG					NM3		VG					NM3		VG					NM3		VG
region	No. of breaths	Mean	stdev	Mean	stdev	% diff	p		Mean	stdev	Mean	stdev	% diff	p		Mean	stdev	Mean	stdev	% diff	p		Mean	stdev	Mean	stdev	% diff	p		Mean	stdev	Mean	stdev	% diff	p		Mean	stdev	Mean	stdev	% diff	p		Mean	stdev	Mean	stdev	% diff	p
Under healthy conditions
PCV15 PEEP5 10:00	102	774.441	9.476	820.531	11.488	5.951	0		774.873	9.552	816.187	12.08	5.332	0		774.657	7.545	818.359	9.292	5.642	0		5.185	0.339	5.08	0.297	2.024	0		9.888	0.313	9.554	0.228	3.379	0		34.509	0.979	37.233	0.946	7.895	0		44.493	0.421	47.761	0.541	7.345	0
PCV5 PEEP 5 10:09	291	308.869	44.83	327.307	48.142	5.969	0.10612		299.509	41.794	304.537	47.169	1.679	0		304.189	42.634	315.922	46.84	3.857	0.0011		3.937	0.45	3.189	0.431	19.005	1		4.538	0.772	4.53	0.772	0.186	0		36.047	1.921	38.998	2.115	8.185	4e-05		22.622	2.791	24.387	3.37	7.802	0.37975
PCV10 PEEP5 10:20	156	542.987	13.046	564.989	13.866	4.052	0		528.891	13.114	557.366	15.981	5.384	0		535.939	12.29	561.178	13.539	4.709	0		4.796	0.21	4.806	0.088	0.196	0		7.608	0.398	7.447	0.376	2.119	0		36.212	0.929	38.998	0.952	7.694	0		34.007	0.556	37.597	0.685	10.556	1
PCV5 PEEP10 10:31	126	423.381	58.566	436.367	56.051	3.067	0.02288		405.04	56.682	372.65	65.441	7.997	0.82771		414.21	57.37	404.508	58.503	2.342	0.01187		8.439	0.346	7.983	1.163	5.404	0.06203		9.444	0.75	9.097	0.773	3.669	2e-05		36.097	1.016	38.773	1.409	7.413	1e-05		22.022	5.355	22.934	5.803	4.14	0.58174
PCV10 PEEP10 10:40	111	584.946	18.453	574.157	36.164	1.844	0		571.099	17.505	546.851	44.809	4.246	0		578.023	16.819	560.504	39.651	3.031	0		8.939	0.22	8.923	0.221	0.171	0		11.397	0.41	11.072	0.621	2.852	0		37.947	4.914	37.796	0.94	0.397	0		35.443	0.938	36.293	4.097	2.398	0
PCV5 PEEP5 RR10	51	413.529	5.877	406.525	6.504	1.694	0		404.765	5.898	385.778	6.095	4.691	0		409.147	5.748	396.152	5.912	3.176	0		3.861	0.216	3.778	0.173	2.137	0		6.692	0.159	6.623	0.062	1.028	0		27.104	2.445	29.285	2.805	8.048	0.75419		24.306	0.434	26.306	0.698	8.23	0.06282
PCV5 PEEP5 RR20	131	416.718	21.373	458.697	24.858	10.074	0.9807		407.527	19.359	421.536	23.944	3.438	0		412.122	20.323	440.117	24.162	6.793	0.00159		3.769	0.144	3.762	0.16	0.189	0		6.176	0.134	6.228	0.147	0.855	0		33.592	3.45	36.816	3.139	9.597	0.91723		25.736	1.085	28.288	1.271	9.917	0.96418
PCV10 PEEP10 RR10	91	667.549	5.644	713.001	14.874	6.809	0		659.89	5.705	681.162	12.707	3.224	0		663.72	5.47	697.082	13.454	5.027	0		9.013	0.118	8.988	0.084	0.28	0		13.598	0.026	13.452	0.024	1.069	0		34.219	0.241	37.566	0.634	9.782	0.81414		38.909	0.312	42.501	0.502	9.233	0.00181
VC200 PEEP10 RR25	201	200.204	10.633	192.32	31.302	3.938	0.00011		179.547	46.162	182.487	39.152	1.637	0.09436		189.876	25.083	187.404	31.945	1.302	6e-05		9.404	0.507	9.763	0.588	3.81	0		11.627	0.123	11.587	0.098	0.345	0		16.905	0.785	17.135	0.704	1.36	0		10.56	2.632	10.846	2.381	2.714	0.17078
VC400 PEEP10 RR15	141	382.844	10.988	390.958	11.579	2.119	0		368.34	7.736	366.223	12.235	0.575	0		375.592	8.644	378.59	11.312	0.798	0		8.511	0.153	8.514	0.2	0.043	0		11.043	0.075	10.953	0.06	0.809	0		17.877	0.506	18.552	0.553	3.776	0		20.354	1.256	22.181	1.782	8.978	0.60378
VC600 PEEP10 RR10	231	557.654	15.17	565.35	34.735	1.38	0		550.325	15.924	566.687	24.076	2.973	0		553.989	15.377	566.019	28.814	2.171	0		9.111	0.124	9.076	0.274	0.38	0		12.092	0.161	11.902	0.169	1.567	0		17.894	3.037	18.624	3.853	4.083	0.00011		34.241	1.301	37.821	1.57	10.455	0.9999
Healthy lungs summary	1632	479.375	19.4596	495.473	26.3239	4.26336			468.164	21.7665	472.86	27.6081	3.74327			473.769	19.7548	484.167	25.7658	3.53164			6.815	0.257	6.71473	0.334455	3.05809			9.46391	0.301909	9.31318	0.302727	1.62527			29.8548	1.83845	31.7978	1.64091	6.20273			28.4266	1.55282	30.6286	2.06364	7.43345
After warm saline lavage
PCV10 PEEP15 1:28	101	496.228	11.867	473.439	11.601	4.592	0		467.307	12.35	445.384	13.358	4.691	0		481.767	11.877	459.411	12.301	4.64	0		13.841	0.147	13.845	0.098	0.034	0		17.533	0.051	17.471	0.037	0.353	0		35.79	0.231	34.583	0.161	3.373	0		40.198	0.542	41.87	0.629	4.16	0
VT200 PEEP10 RR 25 1:39	71	214.479	5.427	181.799	10.62	15.237	1		178.169	29.838	154.43	29.643	13.324	0.99898		196.324	15.368	168.115	16.657	14.369	1		8.494	0.328	8.506	0.417	0.141	0		10.739	0.136	10.715	0.138	0.23	0		16.793	0.616	15.302	0.656	8.877	0.55022		9.535	2.13	8.867	1.488	7.008	0.83921
VT400 PEEP10 RR 15 1:49	121	396.959	5.924	369.718	4.745	6.862	0		373.521	6.642	340.579	9.484	8.819	0.01077		385.24	5.888	355.148	6.455	7.811	0		8.441	0.308	8.41	0.325	0.377	0		11.074	0.272	10.967	0.255	0.965	0		21.819	0.44	20.082	0.444	7.96	0		26.754	1.589	27.537	1.733	2.929	0
VT600 PEEP10 RR 10 1:59	81	593.778	8.407	550.394	7.718	7.306	0		566.951	10.334	518.046	11.64	8.626	0.00012		580.364	8.703	534.22	8.782	7.951	0		9.17	0.194	9.127	0.236	0.471	0		12.133	0.201	11.949	0.108	1.519	0		21.774	0.456	20.019	0.493	8.058	3e-05		39.777	0.773	40.857	0.828	2.717	0
PCV10 PEEP5 2:13	81	358.444	4.219	338.111	3.84	5.673	0		341.543	3.529	332.679	5.305	2.595	0		349.994	3.71	335.395	4.204	4.171	0		4.926	0.16	4.71	0.137	4.381	0		7.549	0.169	7.373	0.145	2.337	0		36.246	0.456	35.065	0.421	3.257	0		33.049	0.397	34.265	0.386	3.677	0
PCV20 PEEP5 2:23	91	680.956	68.394	650.413	8.267	4.485	0.00078		659.374	11.653	620.131	47.912	5.952	0.00061		670.165	35.196	635.272	23.466	5.207	0		4.83	0.236	4.862	0.341	0.666	0		10.179	1.657	10.191	1.935	0.114	0.07122		35.6	2.561	34.627	0.529	2.733	0		50.22	0.417	50.568	0.633	0.694	0
PCV5 PEEP5 2:33	151	208.113	12.347	199.94	12.037	3.927	0		195.377	11.518	175.044	12.086	10.407	0.99432		201.745	11.841	187.492	12.001	7.065	0.01161		3.64	0.242	3.558	0.115	2.273	0		5.494	0.161	5.406	0.15	1.595	0		35.476	1.058	34.326	0.997	3.242	0		19.686	1.404	19.028	1.648	3.342	0
PCV10 PEEP6 2:52	81	312.58	11.455	290.184	3.348	7.165	0		299.198	3.055	300.127	3.957	0.311	0		305.889	6.484	295.155	2.852	3.509	0		5.541	0.325	5.529	0.075	0.216	0		8.458	0.184	8.279	0.133	2.114	0		36.759	0.554	35.264	0.531	4.067	0		32.83	0.4	33.956	0.43	3.431	0
Sick lungs summary	778	407.692	16.005	381.75	7.772	6.90587			385.18	11.1149	360.802	16.6731	6.84063			396.436	12.3834	371.276	10.8398	6.84037			7.36038	0.2425	7.31837	0.218	1.06987			10.3949	0.353875	10.2939	0.362625	1.15338			30.0321	0.7965	28.6585	0.529	5.19588			31.5061	0.9565	32.1185	0.971875	3.49475
PCV = Pressure Control Ventilation mode; PEEP = positive end expiratory pressure; VC = Volume control ventilation mode; RR = respiratory rate; VTi = inspired tidal volume; VTe= expired tidal volume; VTave = average tidal volume; MeanPaw = mean airway pressure; PIF = peak inspiratory flow; PEF = peak expiratory flow; RR = respiratory rate; Ti=inspiratory time; Te = expiratory time
